# Supplementary material for: Prediction of Liver Transplant Rejection With a Biologically Relevant Gene Expression Signature
Source: PubMed Central journal article supplement — Transplantation. 2021 Jul 22;106(5):1004–11. doi: 10.1097/TP.0000000000003895 (PMC9301991; doi:10.1097/tp.0000000000003895), 2021-07-22

## Supplementary Methods

Biomarker Development: All blood samples were drawn directly into PAXgene tubes (BD BioSciences, San Jose, CA), processed, and subjected to a previous workflow using the Affymetrix 3' IVT PLUS labeling kit Array hybridization.<sup>1-3</sup> Raw expression (.CEL) data files generated by the GeneTitan from Affymetrix GeneChip HT HG-U133+PM Array plates were processed for QC metrics using the Affymetrix Expression Console software where each sample that passed was used as input for normalization. Normalization was performed using a custom Frozen Robust Multiarray Analysis<sup>4</sup> vector to generate a fixed set of probe level parameters based on a cohort of 560 CEL files previously generated from LTR.<sup>1</sup> In addition to performing the standard steps of background correction, normalization, and summarization, a major advantage of FRMA over the traditional Robust Multiarray Analysis is that only blood samples from LTR were used in normalization vector creation, increasing the confidence in the values of the LTR specific blood transcripts expressed in these samples for our specific LT biomarker development pipeline. Finally, prior to model development, batch effects were corrected using ComBat.<sup>5</sup>

The genomic discovery and validation phases were performed in accordance to Institute of Medicine guidelines.<sup>6</sup> For discovery of gene expression based biomarkers with the sample groups sizes available in this study, the split sample approach (70% training set, 30% testing set) allows for accurate estimation of phenotypic gene expression profiles while retaining a sufficiently large validation cohort to have confidence in the performance metrics.<sup>7</sup> In this approach, all biomarker discovery steps are performed on the training set with the testing set reserved solely for validation of the final “locked” model. An additional consideration when splitting the samples is maintaining the distribution of the phenotypes and pertinent metadata variables (including reported gender, ethnicity, etc.) in both the training and testing cohorts. Therefore, the NU and CTOT-14 samples were merged and then split into the 70% training and 30% testing groups, based on previous discovery work in kidney transplant recipients.<sup>8,9</sup>

Briefly, the dataset of all probes on the GeneChip were filtered to retain the genes with median expression greater than 6 in 50 percent of the samples and in the top 40<sup>th</sup> percentile of variance across all samples. Five independent classification algorithms (Nearest Shrunken Centroid,<sup>10</sup> Partial Least Squares Discrimination Analysis,<sup>11</sup> Support Vector Machine,<sup>12</sup> Random Forest,<sup>13</sup> Elastic Net<sup>14</sup>) were used to calculate a multivariate score for each probe in the filtered dataset based on metrics (unique for each algorithm) that reflect the relative contribution of a probe towards classification of out of bag samples. For 1000 resamplings of the training datasets, the score represents “the mean of the square accuracy of the models obtained among the set of multivariate methods that selected” the probe.<sup>9</sup> All probes with score greater than 0.2 were retained for use in the next step of the pipeline, with final model generation using random forest. A performance threshold was selected favoring NPV over PPV (above the threshold = AR), and the model and threshold were then locked for validation on the 30% test cohort.

The locked model and threshold were also used on pre-AR and pre-non-AR samples as well as post-AR. As each subject had serial samples collected in the CTOT-14 cohort, a linear mixed effect model with random intercept was used to estimate the pre-biopsy slope for each phenotype to account for within patient correlation. Data first stratified by phenotypes and coefficients were estimated and compared via linear mixed effect model. Another linear mixed effect model was fit to compare the pre- and post-AR slopes. Analysis was performed using R version 3.5.1 (RStudio). Probes from the final locked models were then fed to Ingenuity Core Analysis (Qiagen, Inc., Hilden, Germany) that provides information about enriched pathways and allows comparison to literature data. Enriched pathways were selected based on Fisher’s exact test (p-value<0.05 statistically significant).

## References

1. Levitsky J, Asrani SK, Schiano T, et al. Discovery and validation of a novel blood-based molecular biomarker of rejection following liver transplantation. *Am J Transplant*. 2020.
2. Friedewald JJ, Kurian SM, Heilman RL, et al. Development and clinical validity of a novel blood-based molecular biomarker for subclinical acute rejection following kidney transplant. *Am J Transplant*. 2019;19(1):98-109.
3. Kurian SM, Williams AN, Gelbart T, et al. Molecular classifiers for acute kidney transplant rejection in peripheral blood by whole genome gene expression profiling. *Am J Transplant*. 2014;14(5):1164-1172.
4. McCall MN, Bolstad BM, Irizarry RA. Frozen robust multiarray analysis (fRMA). 2010;11(2):242-253.
5. Wang M, Huang J, Liu Y, Ma L, Potash JB, Han S. COMBAT: a combined association test for genes using summary statistics. *Genetics*. 2017;207(3):883-891.
6. Michell CM, Nass SJ, Ommen GS. Evolution of Translational Omics: Lessons Learned and the Path Forward. *Institute of Medicine*. Washington, DC: The National Academies Press; 2012.
7. Kurian SM, Whisenant T, Mas V, et al. Biomarker guidelines for high-dimensional genomic studies in transplantation: adding method to the madness. *Transplantation*. 2017;101(3):457-463.
8. Zhang W, Yi Z, Keung KL, et al. A Peripheral Blood Gene Expression Signature to Diagnose Subclinical Acute Rejection. *J Am Soc Nephrol*. 2019;30(8):1481-1494.
9. Van Loon E, Gazut S, Yazdani S, et al. Development and validation of a peripheral blood mRNA assay for the assessment of antibody-mediated kidney allograft rejection: A multicentre, prospective study. *EBioMedicine*. 2019;46:463-472.
10. Tibshirani R, Hastie T, Narasimhan B, Chu G. Diagnosis of multiple cancer types by shrunken centroids of gene expression. *PNAS*. 2002;99(10):6567-6572.
11. Thevenot EA, Roux A, Xu Y, Ezan E, Junot C. Analysis of the human adult urinary metabolome variations with age, body mass index, and gender by implementing a comprehensive workflow for univariate and OPLS statistical analyses. *J Proteome Res*. 2015;14(8):3322-3335.
12. Meyer D, Dimitriadou E, Hornik K, Weingessel A, Leisch F. e1071: Misc Functions of the Department of Statistics, Probability Theory Group (Formerly: E1071), TU Wien. Available at: <https://CRAN.R-project.org/package=e1071>. Accessed May 23, 2021.
13. Liaw A, Wiener M. Classification and Regression by randomForest. *R News*. 2002;2(3):18-22.
14. Friedman J, Hastie T, Tibshirani R. Generalized Linear Models via Coordinate Descent. *J Stat Soft*. 2010;33(1):1-22.

**Table S1: AR vs. Non-AR 59-Probe Model – Ingenuity Pathway Analysis**

| <b>Ingenuity Canonical Pathways</b>                                            | <b>-log(p-value)</b> | <b>-log(B-H p-value)</b> | <b>Molecules</b>                        |
|--------------------------------------------------------------------------------|----------------------|--------------------------|-----------------------------------------|
| LXR/RXR Activation                                                             | 5.45                 | 3.19                     | CD36,CLU,IL1R2,LYZ,MMP9                 |
| Glucocorticoid Receptor Signaling                                              | 4.57                 | 2.8                      | ADRB2,CD3G,FCGR1A,IL1R2,MMP9,NFAT5,SLPI |
| Role of NFAT in Regulation of the Immune Response                              | 4.6                  | 2.8                      | CD3G,FCGR1A,GNA12,HLA-DQB1,NFAT5        |
| B Cell Development                                                             | 4.34                 | 2.69                     | HLA-DQB1,IGHM,PTPRC                     |
| CD28 Signaling in T Helper Cells                                               | 4.06                 | 2.65                     | CD3G,HLA-DQB1,NFAT5,PTPRC               |
| iCOS-iCOSL Signaling in T Helper Cells                                         | 4.21                 | 2.65                     | CD3G,HLA-DQB1,NFAT5,PTPRC               |
| Systemic Lupus Erythematosus Signaling                                         | 4.11                 | 2.65                     | CD3G,FCGR1A,IGHM,NFAT5,PTPRC            |
| Atherosclerosis Signaling                                                      | 3.98                 | 2.63                     | CD36,CLU,LYZ,MMP9                       |
| Dendritic Cell Maturation                                                      | 3.36                 | 2.06                     | CD1D,FCGR1A,HLA-DQB1,HLA-DRB4           |
| OX40 Signaling Pathway                                                         | 3.16                 | 1.9                      | CD3G,HLA-DQB1,HLA-DRB4                  |
| Protein Kinase A Signaling                                                     | 3                    | 1.79                     | FLNA,LEF1,NFAT5,PTPN4,PTPRC             |
| T Cell Receptor Signaling                                                      | 2.95                 | 1.77                     | CD3G,NFAT5,PTPRC                        |
| Th1 Pathway                                                                    | 2.78                 | 1.64                     | CD3G,HLA-DQB1,HLA-DRB4                  |
| Inhibition of Angiogenesis by TSP1                                             | 2.71                 | 1.6                      | CD36,MMP9                               |
| Antigen Presentation Pathway                                                   | 2.59                 | 1.56                     | HLA-DQB1,HLA-DRB4                       |
| Neuroinflammation Signaling Pathway                                            | 2.58                 | 1.56                     | HLA-DQB1,MMP9,NFAT5,SNCA                |
| Th2 Pathway                                                                    | 2.64                 | 1.56                     | CD3G,HLA-DQB1,HLA-DRB4                  |
| Role of Macrophages, Fibroblasts and Endothelial Cells in Rheumatoid Arthritis | 2.51                 | 1.51                     | FCGR1A,IL1R2,LEF1,NFAT5                 |
| PKCθ Signaling in T Lymphocytes                                                | 2.48                 | 1.5                      | CD3G,HLA-DQB1,NFAT5                     |
| Cdc42 Signaling                                                                | 2.32                 | 1.47                     | CD3G,HLA-DQB1,HLA-DRB4                  |
| Hematopoiesis from Pluripotent Stem Cells                                      | 2.39                 | 1.47                     | CD3G,IGHM                               |
| Primary Immunodeficiency Signaling                                             | 2.38                 | 1.47                     | IGHM,PTPRC                              |
| Systemic Lupus Erythematosus In T Cell Signaling Pathway                       | 2.41                 | 1.47                     | CD3G,GNA12,HLA-DQB1,HLA-DRB4            |
| T Cell Exhaustion Signaling Pathway                                            | 2.33                 | 1.47                     | HLA-DQB1,HLA-DRB4,NFAT5                 |
| Th1 and Th2 Activation Pathway                                                 | 2.36                 | 1.47                     | CD3G,HLA-DQB1,HLA-DRB4                  |
| B Cell Receptor Signaling                                                      | 2.26                 | 1.42                     | IGHM,NFAT5,PTPRC                        |
| ILK Signaling                                                                  | 2.23                 | 1.42                     | FLNA,LEF1,MMP9                          |
| Oxidized GTP and dGTP Detoxification                                           | 2.24                 | 1.42                     | DDX6                                    |
| IL-8 Signaling                                                                 | 2.17                 | 1.38                     | DEFA1 (includes others),GNA12,MMP9      |
| Calcium-induced T Lymphocyte Apoptosis                                         | 2.14                 | 1.36                     | CD3G,HLA-DQB1                           |
| Osteoarthritis Pathway                                                         | 2.06                 | 1.31                     | IL1R2,LEF1,MMP9                         |
| Role of Osteoblasts, Osteoclasts and Chondrocytes in Rheumatoid Arthritis      | 2.07                 | 1.31                     | IL1R2,LEF1,NFAT5                        |
| Allograft Rejection Signaling                                                  | 1.92                 | 1.2                      | HLA-DQB1,HLA-DRB4                       |
| IL-4 Signaling                                                                 | 1.93                 | 1.2                      | HLA-DQB1,NFAT5                          |
| Phosphatidylcholine Biosynthesis I                                             | 1.87                 | 1.17                     | CHPT1                                   |
| Regulation of IL-2 Expression in Activated and Anergic T Lymphocytes           | 1.88                 | 1.17                     | CD3G,NFAT5                              |
| Cardiac Hypertrophy Signaling (Enhanced)                                       | 1.82                 | 1.14                     | ADRB2,GNA12,IL1R2,NFAT5                 |
| Communication between Innate and Adaptive Immune Cells                         | 1.83                 | 1.14                     | HLA-DRB4,IGHM                           |
| PD-1, PD-L1 cancer immunotherapy pathway                                       | 1.75                 | 1.09                     | HLA-DQB1,HLA-DRB4                       |
| Type I Diabetes Mellitus Signaling                                             | 1.71                 | 1.06                     | CD3G,HLA-DQB1                           |
| MSP-RON Signaling In Macrophages Pathway                                       | 1.7                  | 1.05                     | HLA-DQB1,HLA-DRB4                       |

| <b>Ingenuity Toxicity Lists</b>                                            | <b>-log (p-value)</b> | <b>Molecules</b>           |
|----------------------------------------------------------------------------|-----------------------|----------------------------|
| LXR/RXR Activation                                                         | 5.41                  | LYZ,CD36,MMP9,CLU,IL1R2    |
| Increases Cardiac Dysfunction                                              | 3.53                  | ADRB2,CD36,MMP9            |
| Liver Necrosis/Cell Death                                                  | 3.44                  | MMP9,DICER1,FLNA,ADM,PTPRC |
| Increases Cardiac Dilation                                                 | 3.43                  | ADRB2,MMP9                 |
| Increases Heart Failure                                                    | 3.09                  | ADRB2,MMP9                 |
| Increases Renal Damage                                                     | 3.06                  | FCGR1A,KLRB1,ADM           |
| Persistent Renal Ischemia-Reperfusion Injury (Mouse)                       | 2.82                  | LYZ,CLU                    |
| Acute Renal Failure Panel (Rat)                                            | 2.19                  | CLU,ADM                    |
| Renal Safety Biomarker Panel (PSTC)                                        | 1.94                  | CLU                        |
| Cardiac Fibrosis                                                           | 1.88                  | ADRB2,MMP9,DICER1          |
| Mechanism of Gene Regulation by Peroxisome Proliferators via PPAR $\alpha$ | 1.84                  | CD36,IL1R2                 |
| Cardiac Necrosis/Cell Death                                                | 1.67                  | ADRB2,DICER1,ADM           |
| Hepatic Fibrosis                                                           | 1.54                  | ADRB2,MMP9,HLA-DQB1        |
| Renal Necrosis/Cell Death                                                  | 1.52                  | SNCA,CLU,GNA12,NFAT5       |
| Increases Glomerular Injury                                                | 1.5                   | FCGR1A,ADM                 |
| Genes associated with Chronic Allograft Nephropathy (Human)                | 1.4                   | MMP9                       |
| Cardiac Hypertrophy                                                        | 1.39                  | ADRB2,MMP9,DICER1          |

Figure S1.

# Combined set

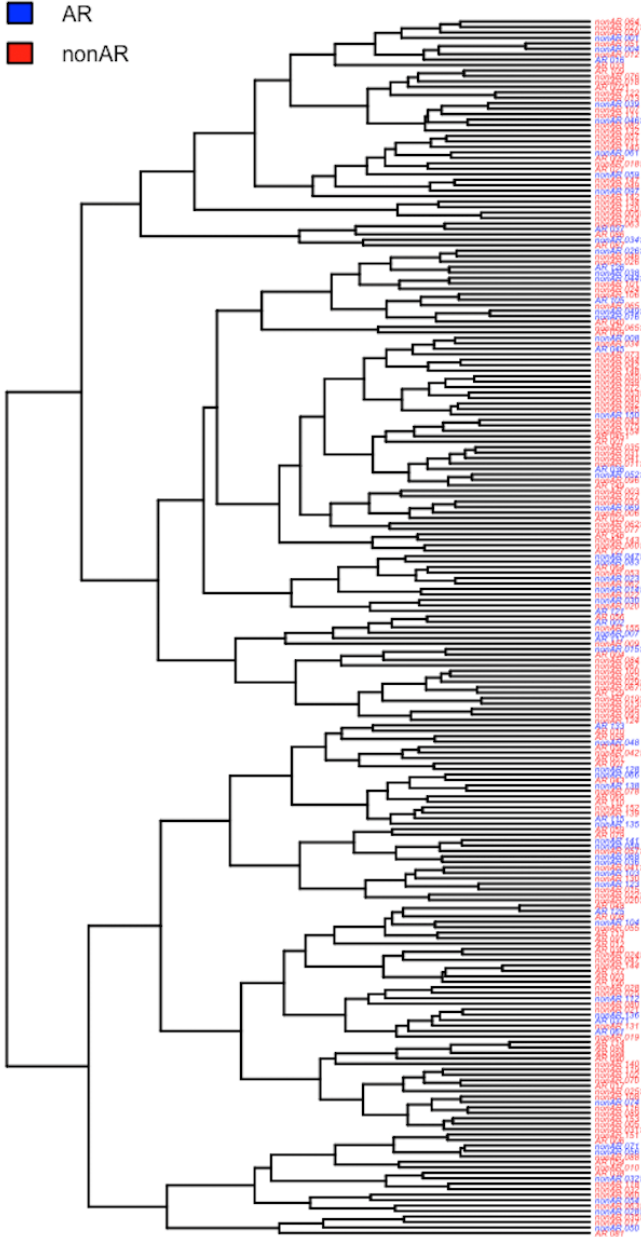

Supplement: tp-106-1004-s001.pdf [file tp-106-1004-s001.pdf]
